# Supplementary material
Source: PubMed Central journal article supplement (PMC2853025)
Supplement: NIHMS174575-supplement-1.pdf [file NIHMS174575-supplement-1.pdf]

## **SINGLE NUCLEOTIDE POLYMORPHISMS INSIDE microRNA TARGET SITES INFLUENCE TUMOR SUSCEPTIBILITY**

Milena S. Nicoloso, Hao Sun, Riccardo Spizzo, Hyunsoo Kim, Priyankara Wickramasinghe, Masayoshi Shimizu, Sylwia E. Wojcik, Jana Ferdin, Tanja Kunej, Lianchun Xiao, Siranoush Manoukian, Giorgio Secreto, Fernando Ravagnani, Xuemei Wang, Paolo Radice, Carlo M. Croce, Ramana V. Davuluri and George A. Calin.

### **SUPPLEMENTAL MATERIAL**

#### **Supplemental Materials and Methods**

##### **Supplemental Tables**

**Table S1.** List of transcribed SNPs found to be associated with breast cancer in PubMed.

**Table S2.** miRNA::mRNA MFE changes induced by breast cancer-associated SNPs.

**Table S3.** List of interactions between miRNAs and breast cancer-associated SNPs tested by luciferase assay.

**Table S4.** Top 100 miRNA::SNP allele specific MFE changes in 5' UTR.

**Table S5.** Top 100 miRNA::SNP allele specific MFE changes in CDS SNPs.

**Table S6.** Top 100 miRNA::SNP allele specific MFE changes in 3' UTR SNPs.

**Table S7.** List of the SNPs found by Saunders et al. in experimentally verified miRNA target genes used for calculating miRNA binding MFE change.

**Table S8.** Distribution of target SNPs genotype among sporadic and familial BC cases and controls.

**Table S9.** MiRNAs predicted by miRanda to target the cis SNP rs1065663 and rs1061810.

##### **Supplemental Figures**

**Figure S1.** Realtime analyses of endogenous miRNA levels in breast samples and cell lines.

**Figure S2.** MFE change distribution for SNPs located either in 3' UTRs, CDS or 5' UTRs.

**Figure S3.** Luciferase reporter assay for pGL3-rs28382751-XIAP.

**Figure S4.** Effects on luciferase activity and protein expression of a conserved miR-638 target inside BRCA1 3' UTR.

##### **Supplemental References**

## Supplemental Material and Methods

**Patient Information.** Cases were 335 female patients affected with invasive BC. Familial BC cases were ascertained through the Medical Genetics Unit of the INT Milan, as eligible for mutation testing in *BRCA1* and *BRCA2* genes, based on criteria including family history and age at cancer diagnosis (1). Mutation analysis was carried out as previously described (1). Only individuals who tested negative for deleterious mutations in coding sequences of both genes were included in the study. This group included 169 women with BC (median age at diagnosis: 44; range: 21- 77). Sporadic BC cases included 166 consecutive women at first diagnosis of BC, surgically treated at INT Milan between November 2004 and August 2005 and unselected for family history of cancer (median age at diagnosis: 56; range: 23-97). Controls were 186 Italian female blood donors recruited through the Immunohematology and Transfusion Medicine Service of INT Milan (median age: 56; range: 48-71).

**Statistical Analysis.** For multivariate analysis, initially a full model including SNPs with p value less than 0.1 in the univariate analysis and age were fitted, then a backward selection procedure was used for model selection until all variables retained in the model were significant at the 0.05 significance level. The univariate and multivariate logistic regression analyses were performed for the following comparisons: Familiar + Sporadic vs. Control, Familiar vs. Control, Sporadic vs. control and Familiar vs. **Sporadic**.

**RNA extraction, Retrotranscription and Realtime PCR.** Cells total RNA was isolated from using TRIzol reagent (Invitrogen). For quantification of transfected and/or endogenous mature miRNA levels (data not shown) we used TaqMan® MicroRNA Reverse Transcription Kit, TaqMan® MicroRNA assays together with TaqMan® Universal PCR Master Mix, No AmpErase® UNG (Applied Biosystems). We employed the 2-Delta Ct method to calculate the relative abundance of microRNA compared with RNU6B expression (2). Realtime PCR reaction and analyses were carried out in 96-well optical reaction plates using iQ5 MultiColor Detection system (Biorad).

## Supplemental Figures

**Figure S1.** Realtime analyses of endogenous miRNA levels in breast samples and cell lines. miRNAs tested for their interaction with BC associated SNPs in the main text are expressed in breast samples (normal and tumor) from an independent set of patients. Samples number 3, 6, 9 are paired (normal and tumor). MM231, MBMDA231.

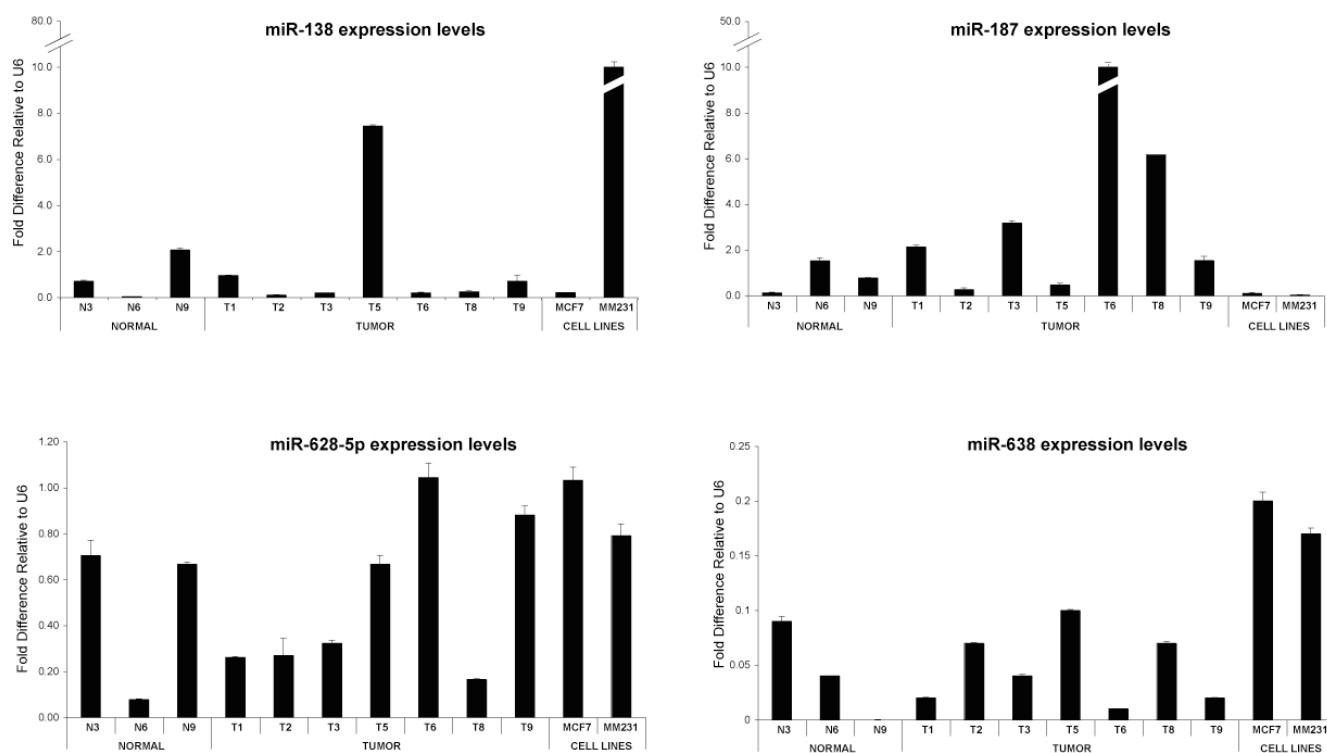

**Figure S2.** MFE change distribution for SNPs located either in 3' UTRs, CDS or 5' UTRs. In red is marked the  $\pm 8\%$  threshold in MFE change, which corresponds for all three distributions to the peaks of the bimodal distribution and to the 20 and 80 percentiles.

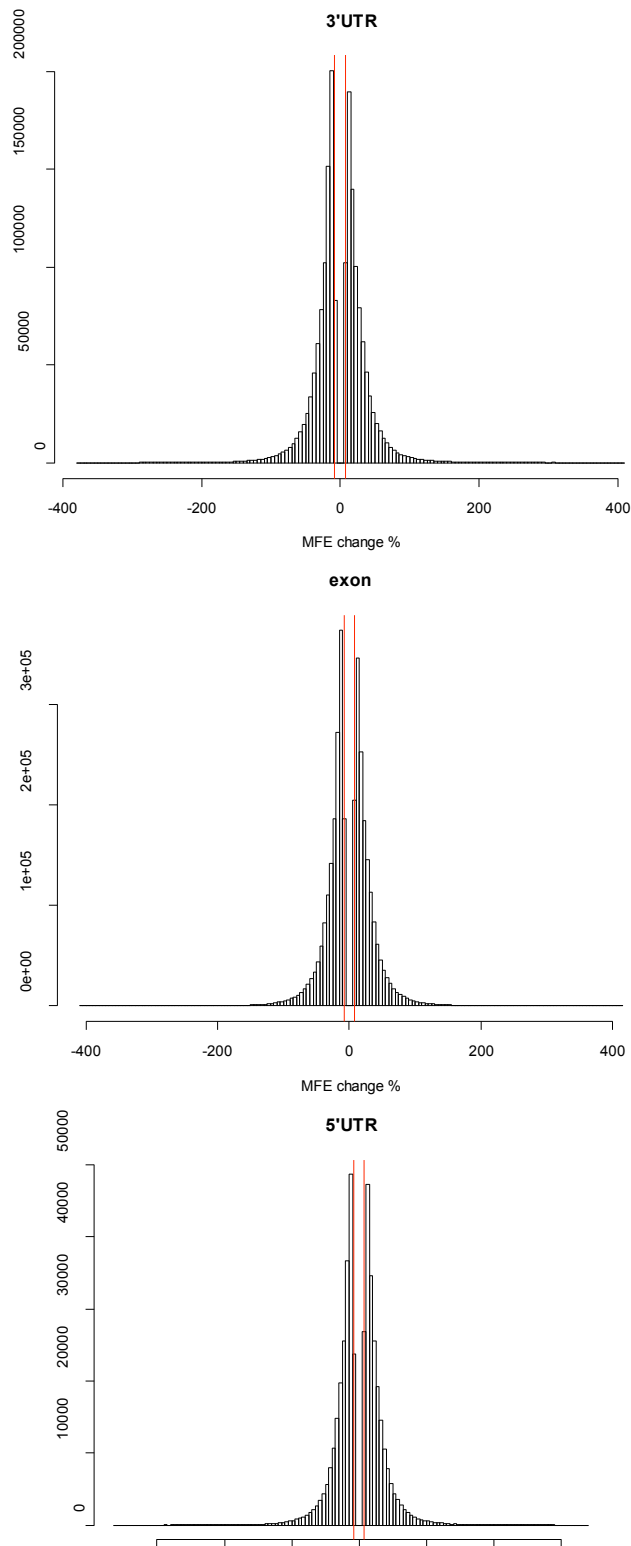

**Figure S3.** Luciferase reporter assay for pGL3-rs28382751-XIAP. **A)** miRNA::mRNA duplex for rs28382751-XIAP::miR-542-5p interaction is shown, with the active allele (green) or the non-active allele (red) highlighted. **B)** Luciferase reporter assay for pGL3-rs28382751 co-transfected either with scrambled negative control and miR-542-5p. Luciferase activity is expressed relative to scrambled negative control (=1); values represent the average +/- standard deviation of 3 independent experiments performed in six replicates.

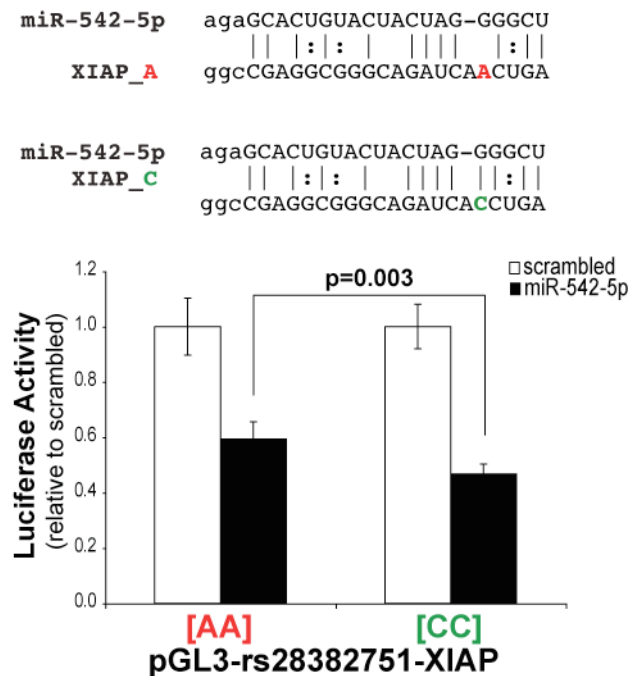

**Figure S4.** Effects on luciferase activity and protein expression of a conserved miR-638 target inside BRCA1 3' UTR. **A)** Targetscan prediction for a *miR-638* conserved target site inside BRCA1 3' UTR. **B)** Luciferase reporter assay for pGL3-BRCA1-3' UTR co-transfected either with scrambled negative control or *miR-638*. Luciferase activity is expressed relative to scrambled negative control (=1); values represent the average +/- standard deviation of 3 independent experiments performed in six replicates. *miR-638* does not repress the activity of the luciferase construct containing BRCA1 3' UTR. **C)** Over-expression of *miR-638* was validated by realtime PCR. **D)** WB for BRCA1 in MCF7 cells co-transfected with scrambled negative control or *miR-638* together with a pCMV empty vector or pCMV BRCA1 expressing vector without its 3' UTR. BRCA1 CDS was mutagenized (QuikChange Site-Directed Mutagenesis Kit, Stratagene) to obtain two different pCMV-BRCA1 vectors encoding the rs777917 [C] and [T] alleles. Suppression of BRCA1 protein levels was achieved by *miR-638* in the absence of BRCA1 3' UTR and was greater with rs777917 [C] active allele.

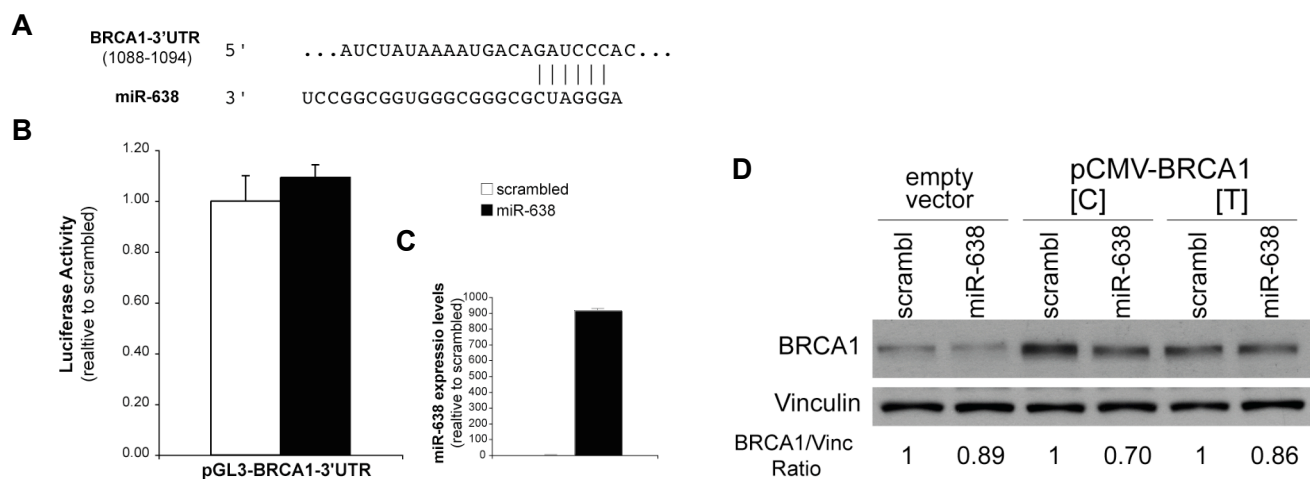

## Supplemental References

1. Manoukian S, Peissel B, Pensotti V, et al. Germline mutations of TP53 and BRCA2 genes in breast cancer/sarcoma families. *Eur J Cancer* 2007;43:601-606.
2. Schmittgen TD, Livak KJ. Analyzing real-time PCR data by the comparative C(T) method. *Nat Protoc* 2008;3:1101-1108.
3. Kaklamani VG, Sadim M, Hsi A, et al. Variants of the adiponectin and adiponectin receptor 1 genes and breast cancer risk. *Cancer Res* 2008;68:3178-3184.
4. Nordgard SH, Johansen FE, Alnaes GI, et al. Genome-wide analysis identifies 16q deletion associated with survival, molecular subtypes, mRNA expression, and germline haplotypes in breast cancer patients. *Genes Chromosomes Cancer* 2008;47:680-696.
5. Colomer R, Monzo M, Tusquets I, et al. A single-nucleotide polymorphism in the aromatase gene is associated with the efficacy of the aromatase inhibitor letrozole in advanced breast carcinoma. *Clin Cancer Res* 2008;14:811-816.
6. Fasching PA, Loehberg CR, Strissel PL, et al. Single nucleotide polymorphisms of the aromatase gene (CYP19A1), HER2/neu status, and prognosis in breast cancer patients. *Breast Cancer Res Treat* 2008;112:89-98.
7. Haiman CA, Hsu C, de Bakker PI, et al. Comprehensive association testing of common genetic variation in DNA repair pathway genes in relationship with breast cancer risk in multiple populations. *Hum Mol Genet* 2008;17:825-834.
8. Lu J, Wei Q, Bondy ML, et al. Genetic variants in the H2AFX promoter region are associated with risk of sporadic breast cancer in non-Hispanic white women aged  $\leq 55$  years. *Breast Cancer Res Treat* 2008;110:357-366.
9. Garner CP, Ding YC, John EM, et al. Genetic variation in IGFBP2 and IGFBP5 is associated with breast cancer in populations of African descent. *Hum Genet* 2008;123:247-255.
10. Brendle A, Lei H, Brandt A, et al. Polymorphisms in predicted microRNA-binding sites in integrin genes and breast cancer: ITGB4 as prognostic marker. *Carcinogenesis* 2008;29:1394-1399.
11. Driver KE, Song H, Lesueur F, et al. Association of single-nucleotide polymorphisms in the cell cycle genes with breast cancer in the British population. *Carcinogenesis* 2008;29:333-341.
12. Ma H, Jin G, Hu Z, et al. Variant genotypes of CDKN1A and CDKN1B are associated with an increased risk of breast cancer in Chinese women. *Int J Cancer* 2006;119:2173-2178.
13. Vaclavikova R, Nordgard SH, Alnaes GI, et al. Single nucleotide polymorphisms in the multidrug resistance gene 1 (ABCB1): effects on its expression and clinicopathological characteristics in breast cancer patients. *Pharmacogenet Genomics* 2008;18:263-273.
14. Huang MY, Wang YH, Chen FM, et al. Multiple Genetic Polymorphisms of GSTP1 313AG, MDR1 3435CC, and MTHFR 677CC highly correlated with early relapse of breast cancer patients in Taiwan. *Ann Surg Oncol* 2008;15:872-880.
15. Mitra AK, Singh N, Singh A, et al. Association of polymorphisms in base excision repair genes with the risk of breast cancer: a case-control study in North Indian women. *Oncol Res* 2008;17:127-135.
16. Sangrajrang S, Schmezer P, Burkholder I, et al. Polymorphisms in three base excision repair genes and breast cancer risk in Thai women. *Breast Cancer Res Treat* 2008;111:279-288.
17. Gonzalez-Hormazabal P, Bravo T, Blanco R, et al. Association of common ATM variants with familial breast cancer in a South American population. *BMC Cancer* 2008;8:117.
18. Schrauder M, Frank S, Strissel PL, et al. Single nucleotide polymorphism D1853N of the ATM gene may alter the risk for breast cancer. *J Cancer Res Clin Oncol* 2008;134:873-882.
19. Stacey SN, Sulem P, Johannsson OT, et al. The BARD1 Cys557Ser variant and breast cancer risk in Iceland. *PLoS Med* 2006;3:e217.
20. Commonly studied single-nucleotide polymorphisms and breast cancer: results from the Breast Cancer Association Consortium. *J Natl Cancer Inst* 2006;98:1382-1396.
21. Cox A, Dunning AM, Garcia-Closas M, et al. A common coding variant in CASP8 is associated with breast cancer risk. *Nat Genet* 2007;39:352-358.
22. Long JR, Kataoka N, Shu XO, et al. Genetic polymorphisms of the CYP19A1 gene and breast cancer survival. *Cancer Epidemiol Biomarkers Prev* 2006;15:2115-2122.
23. Rajaraman P, Bhatti P, Doody MM, et al. Nucleotide excision repair polymorphisms may modify ionizing radiation-related breast cancer risk in US radiologic technologists. *Int J Cancer* 2008;123:2713-2716.
24. Dossus L, McKay JD, Canzian F, et al. Polymorphisms of genes coding for ghrelin and its receptor in relation to anthropometry, circulating levels of IGF-I and IGFBP-3, and breast cancer risk: a case-control study nested within the European Prospective Investigation into Cancer and Nutrition (EPIC). *Carcinogenesis* 2008;29:1360-1366.

25. Wagner K, Hemminki K, Grzybowska E, et al. Polymorphisms in genes involved in GH1 release and their association with breast cancer risk. *Carcinogenesis* 2006;27:1867-1875.
26. Slattery ML, Curtin K, Giuliano AR, et al. Active and passive smoking, IL6, ESR1, and breast cancer risk. *Breast Cancer Res Treat* 2008;109:101-111.
27. Slattery ML, Curtin K, Sweeney C, et al. Modifying effects of IL-6 polymorphisms on body size-associated breast cancer risk. *Obesity (Silver Spring)* 2008;16:339-347.
28. Decock J, Paridaens R, Ye S. Genetic polymorphisms of matrix metalloproteinases in lung, breast and colorectal cancer. *Clin Genet* 2008;73:197-211.
29. Fagerholm R, Hofstetter B, Tommiska J, et al. NAD(P)H:quinone oxidoreductase 1 NQO1\*2 genotype (P187S) is a strong prognostic and predictive factor in breast cancer. *Nat Genet* 2008;40:844-853.
30. Johnatty SE, Spurdle AB, Beesley J, et al. Progesterone receptor polymorphisms and risk of breast cancer: results from two Australian breast cancer studies. *Breast Cancer Res Treat* 2008;109:91-99.
31. Pooley KA, Healey CS, Smith PL, et al. Association of the progesterone receptor gene with breast cancer risk: a single-nucleotide polymorphism tagging approach. *Cancer Epidemiol Biomarkers Prev* 2006;15:675-682.
32. Abbas S, Nieters A, Linseisen J, et al. Vitamin D receptor gene polymorphisms and haplotypes and postmenopausal breast cancer risk. *Breast Cancer Res* 2008;10:R31.
33. Barroso E, Fernandez LP, Milne RL, et al. Genetic analysis of the vitamin D receptor gene in two epithelial cancers: melanoma and breast cancer case-control studies. *BMC Cancer* 2008;8:385.
34. Abbas S, Linseisen J, Slanger T, et al. The Gc2 allele of the vitamin D binding protein is associated with a decreased postmenopausal breast cancer risk, independent of the vitamin D status. *Cancer Epidemiol Biomarkers Prev* 2008;17:1339-1343.
35. Silva SN, Moita R, Azevedo AP, et al. Menopausal age and XRCC1 gene polymorphisms: role in breast cancer risk. *Cancer Detect Prev* 2007;31:303-309.
36. Willems P, Claes K, Baeyens A, et al. Polymorphisms in nonhomologous end-joining genes associated with breast cancer risk and chromosomal radiosensitivity. *Genes Chromosomes Cancer* 2008;47:137-148.
37. Saunders MA, Liang H, Li WH. Human polymorphism at microRNAs and microRNA target sites. *Proc Natl Acad Sci U S A* 2007;104:3300-3305.
38. Spielman RS, Bastone LA, Burdick JT, Morley M, Ewens WJ, Cheung VG. Common genetic variants account for differences in gene expression among ethnic groups. *Nat Genet* 2007;39:226-231.
